# Supplementary material
Source: publisher figshare collection journal article supplement (https://acs.figshare.com/ndownloader/files/4789717)
Supplement: Supplementary file 1 [file 4789717]

# Supporting Information

## Chlorine-Induced In-situ Regulation to Synthesize Graphene Frameworks with Large Specific Area for Excellent Supercapacitor Performance

*Yanyan Zhu,<sup>†,‡</sup> Huijuan Cui,<sup>†,‡</sup> Xin Meng,<sup>†</sup> Jianfeng Zheng<sup>†</sup> Pengju Yang,<sup>†,‡</sup> Li*

*Li,<sup>†</sup> Zhijian Wang<sup>†</sup>, Suping Jia,<sup>\*</sup>,<sup>†</sup> and Zhenping Zhu<sup>\*</sup>,<sup>†</sup>*

<sup>†</sup>State Key Laboratory of Coal Conversion, Institute of Coal Chemistry, Chinese

Academy of Sciences, Taoyuan South Road 27, Taiyuan, 030001 China

<sup>‡</sup>University of Chinese Academy of Sciences, Beijing, 100049 China

\*Email: jiasuping@sxicc.ac.cn ; Tel: +86-351-4048715; Fax: +86-351-4048433.

\*Email: zpzhzhu@sxicc.ac.cn.

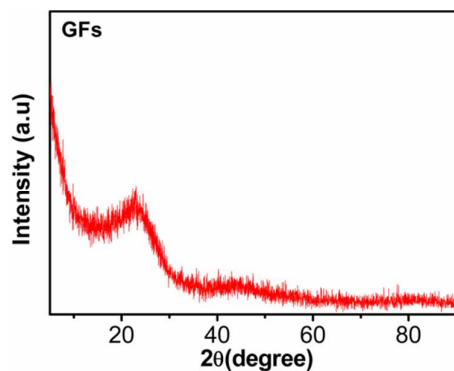

**Figure S1** XRD pattern of the GFs that was after washing fast pyrolysis sample of NaAcCl at 1000 °C.

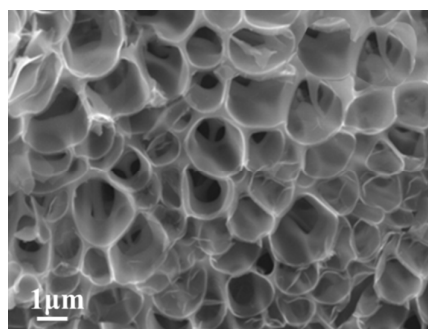

**Figure S2.** SEM image of the washed products obtained from the fast decomposition of NaAc.

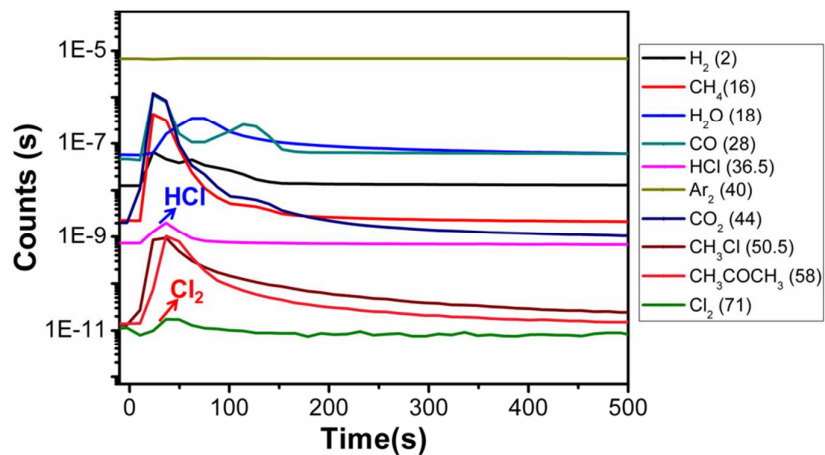

**Figure S3.** Mass spectrometry cycles obtained over the duration of heating for gas products detection during fast pyrolysis of NaAcCl at 1000 °C.

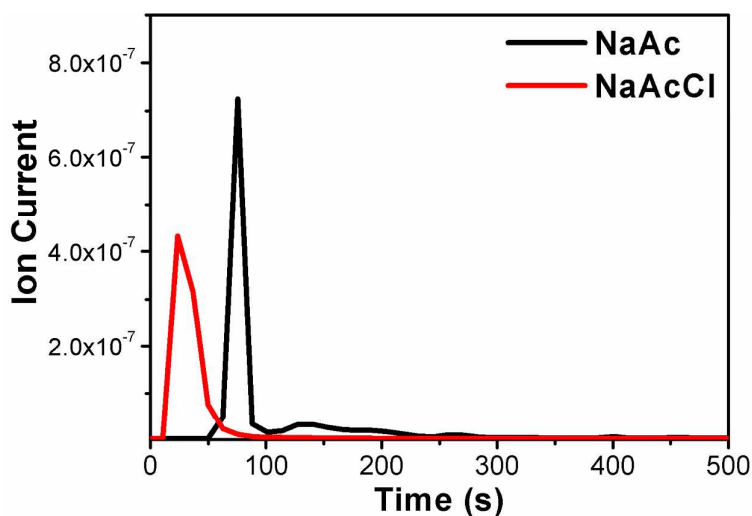

**Figure S4.** Mass spectrometry cycles obtained over the duration of heating emphasizing 16 amu fragments ( $\text{CH}_4$ ) during fast pyrolysis of NaAc and NaAcCl at the temperature of  $1000^\circ\text{C}$ .

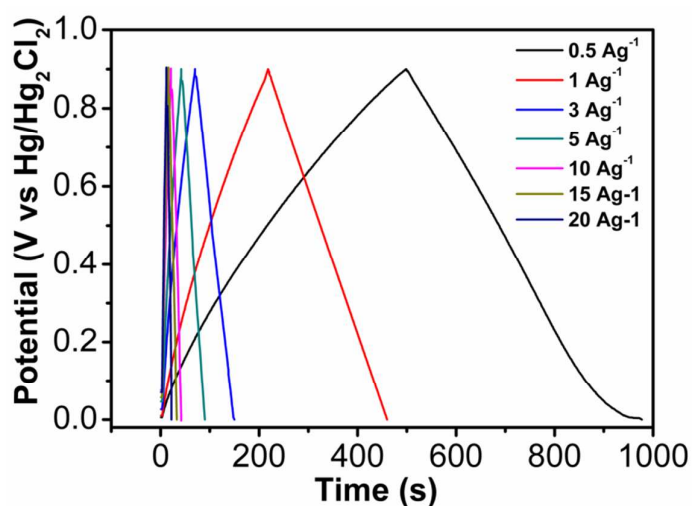

**Figure S5** Galvanostatic charge and discharge curves of GFs-NaAcCl at different current densities.
